# Supplementary material
Source: ML conference proceedings conference paper supplement (https://proceedings.neurips.cc/paper_files/paper/2018/hash/8f468c873a32bb0619eaeb2050ba45d1-Abstract.html)

NeurIPS'18 Paper #968:  
Precision and Recall for Time Series

Supplementary Material  
for Section 5.4

# Readme

- This file contains line graphs for our 3 experimental datasets for LSTM-AD, Greenhouse, and Luminol.
- For each dataset, we plot real and predicted anomaly ranges for their respective time series.
- On each graph, x-axis represents time and y-axis denotes where anomalies are.  $(t,1)$  means that the data value at timestamp  $x=t$  is anomalous, whereas  $(t,0)$  means that it is not.
- We used these graphs as reference in understanding and explaining the experimental results in Section 5.4 of our paper.

Real Anomaly Ranges

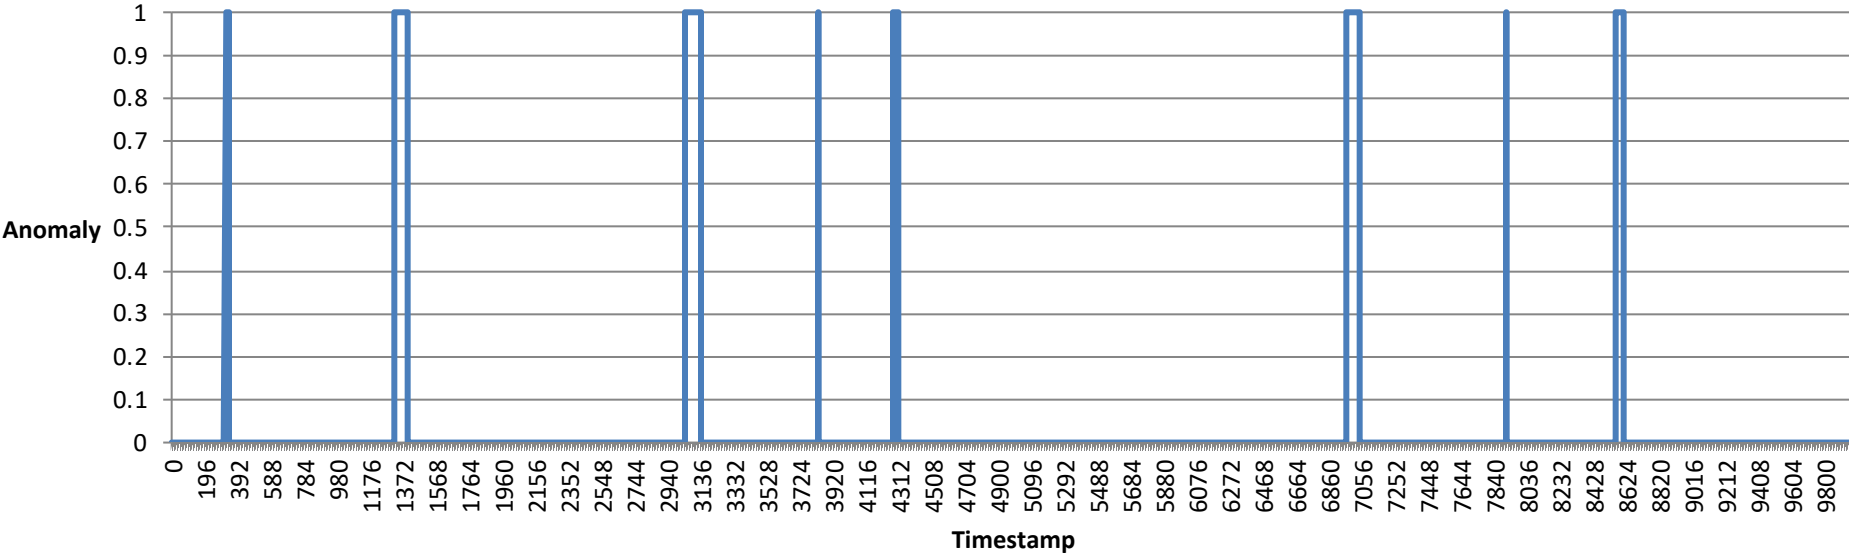

Predicted Anomaly Ranges

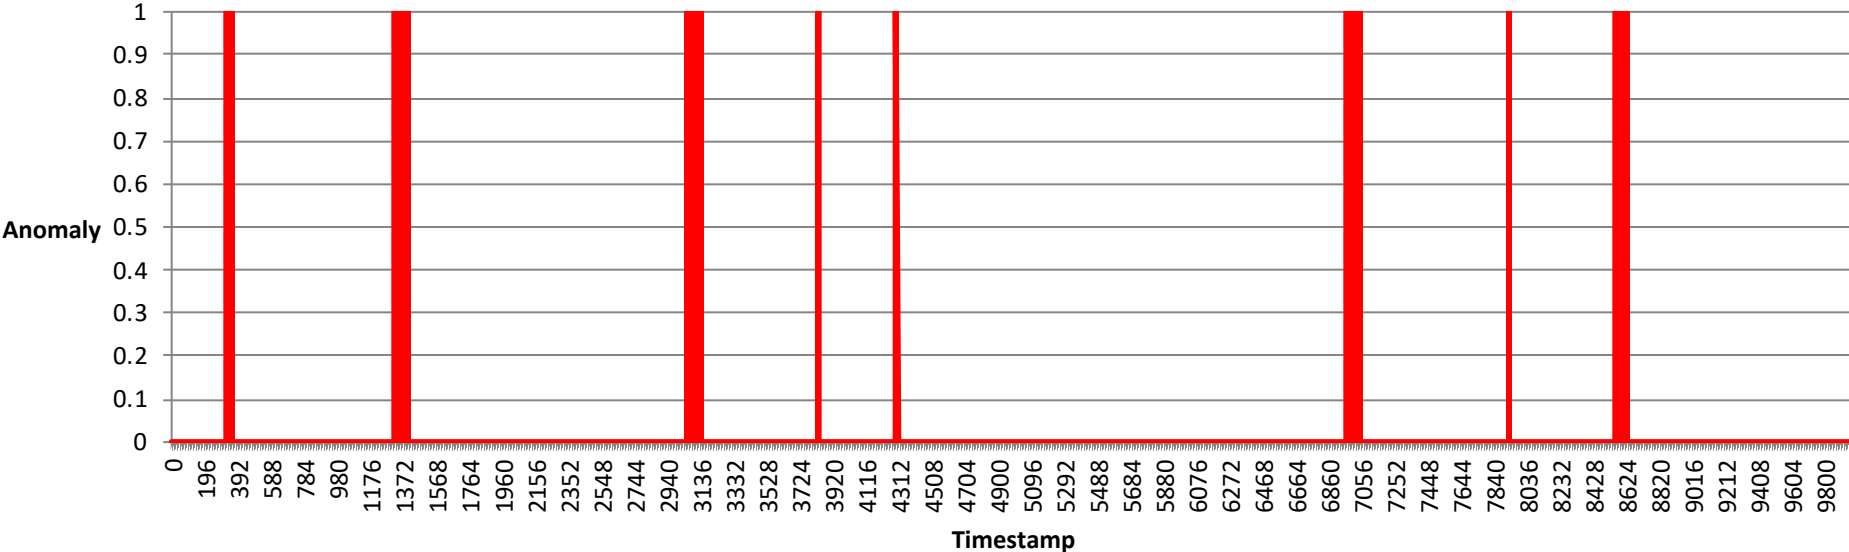

# Sine, Greenhouse

Real Anomaly Ranges



Predicted Anomaly Ranges

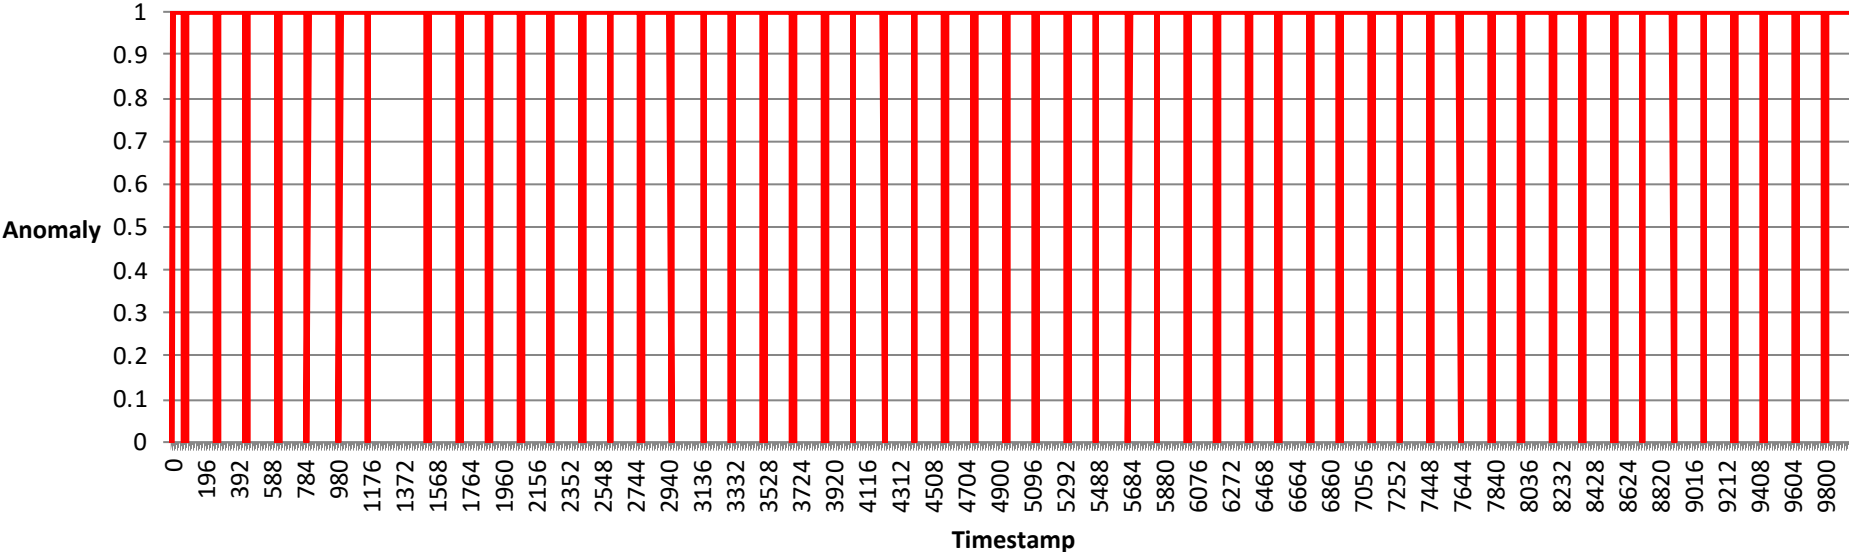

Real Anomaly Ranges



Predicted Anomaly Ranges

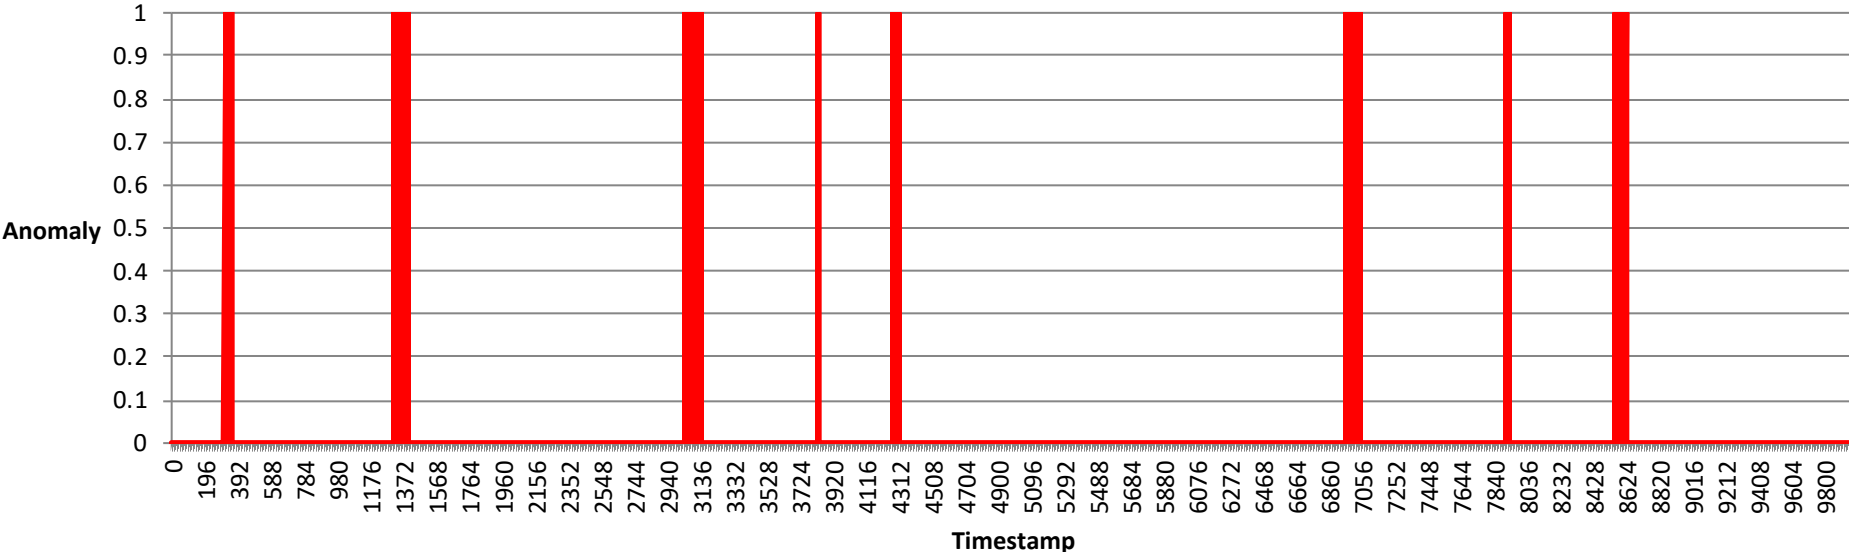

Real Anomaly Ranges

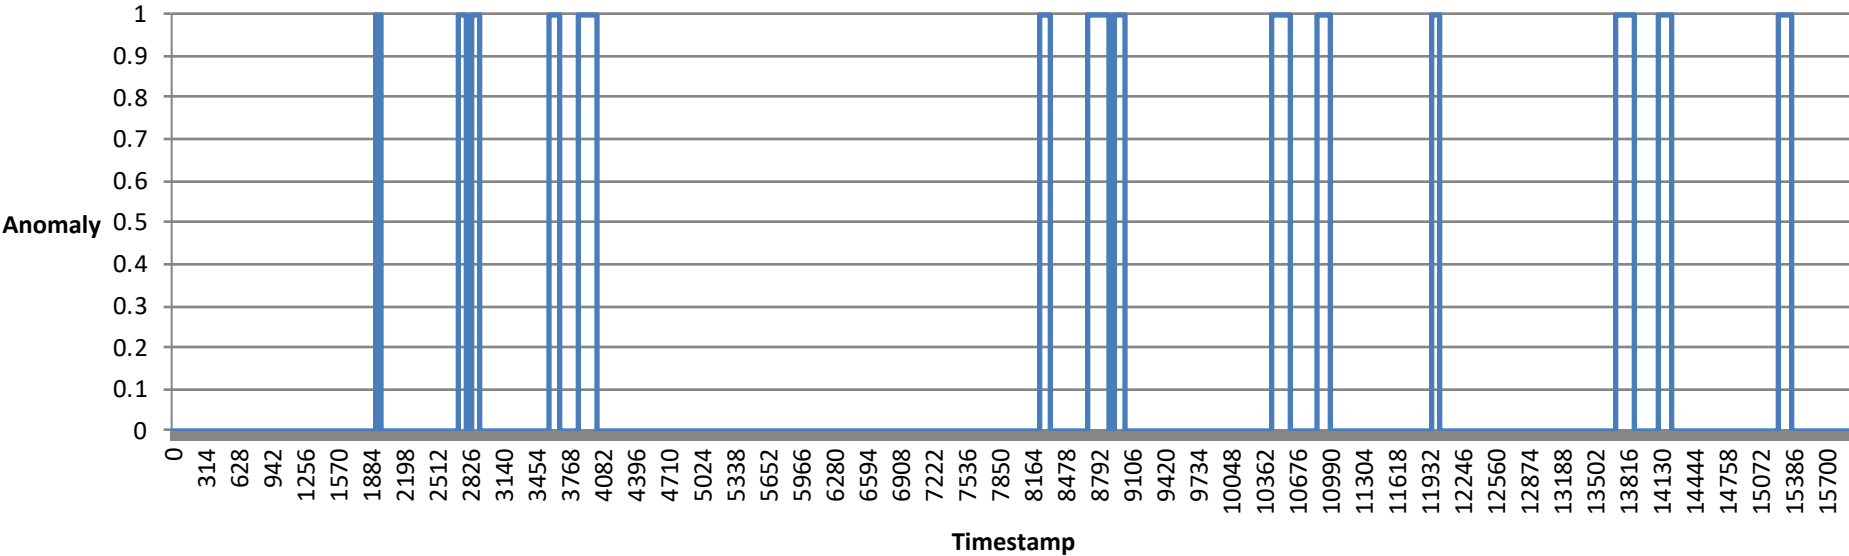

Predicted Anomaly Ranges

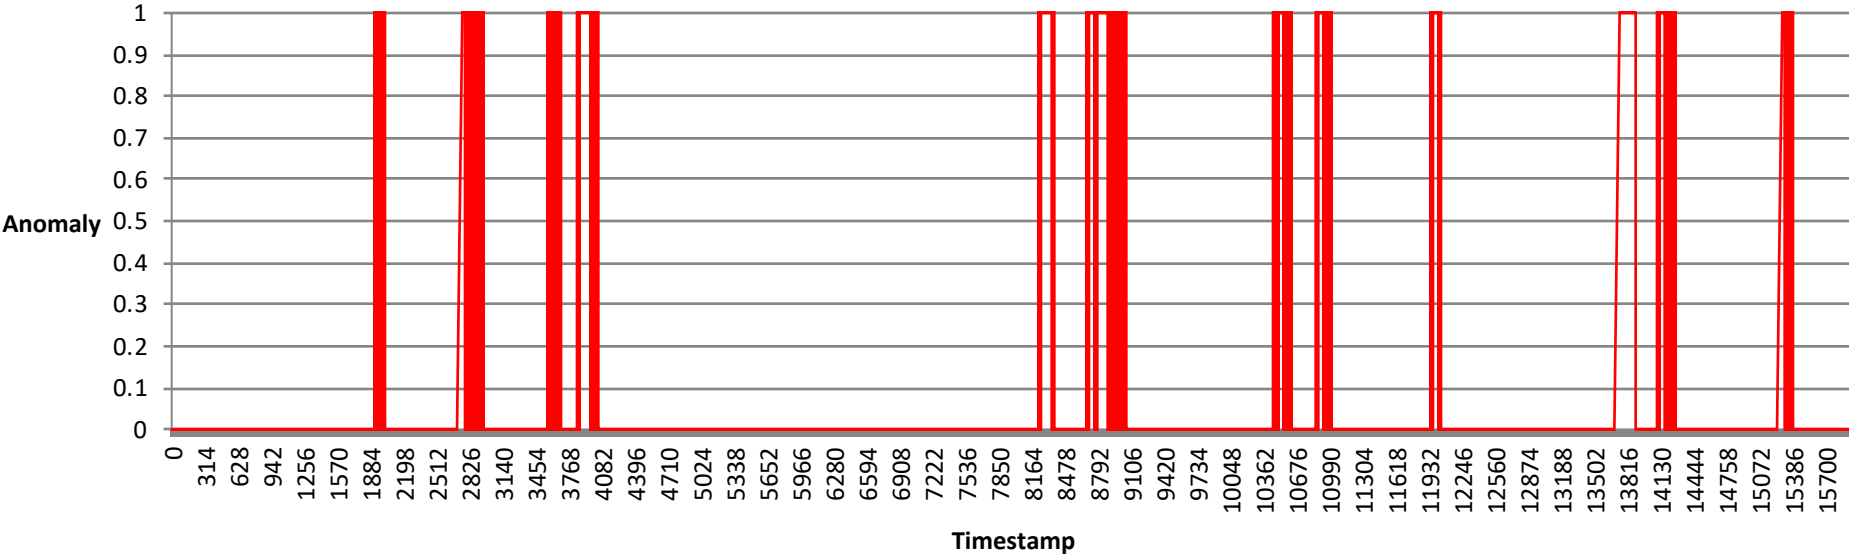

## Real Anomaly Ranges

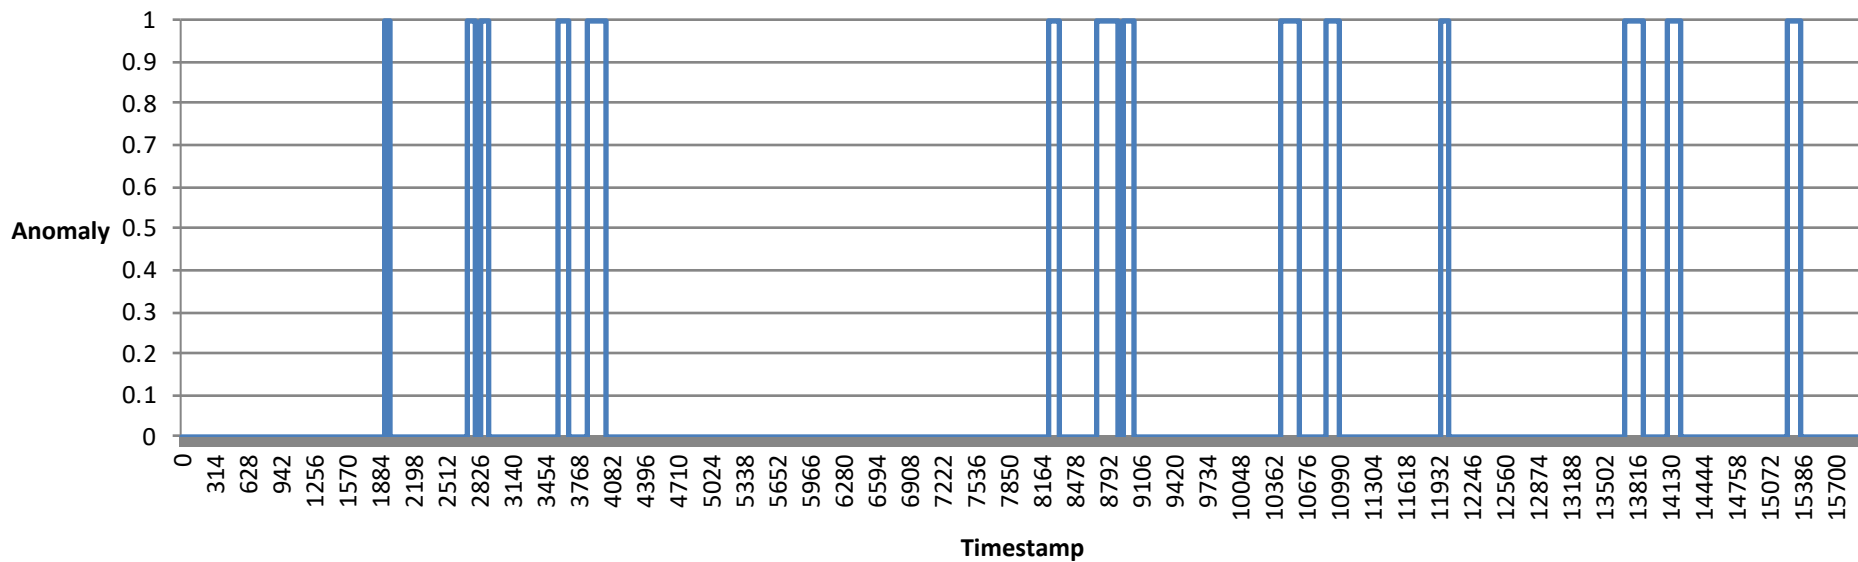

## Predicted Anomaly Ranges

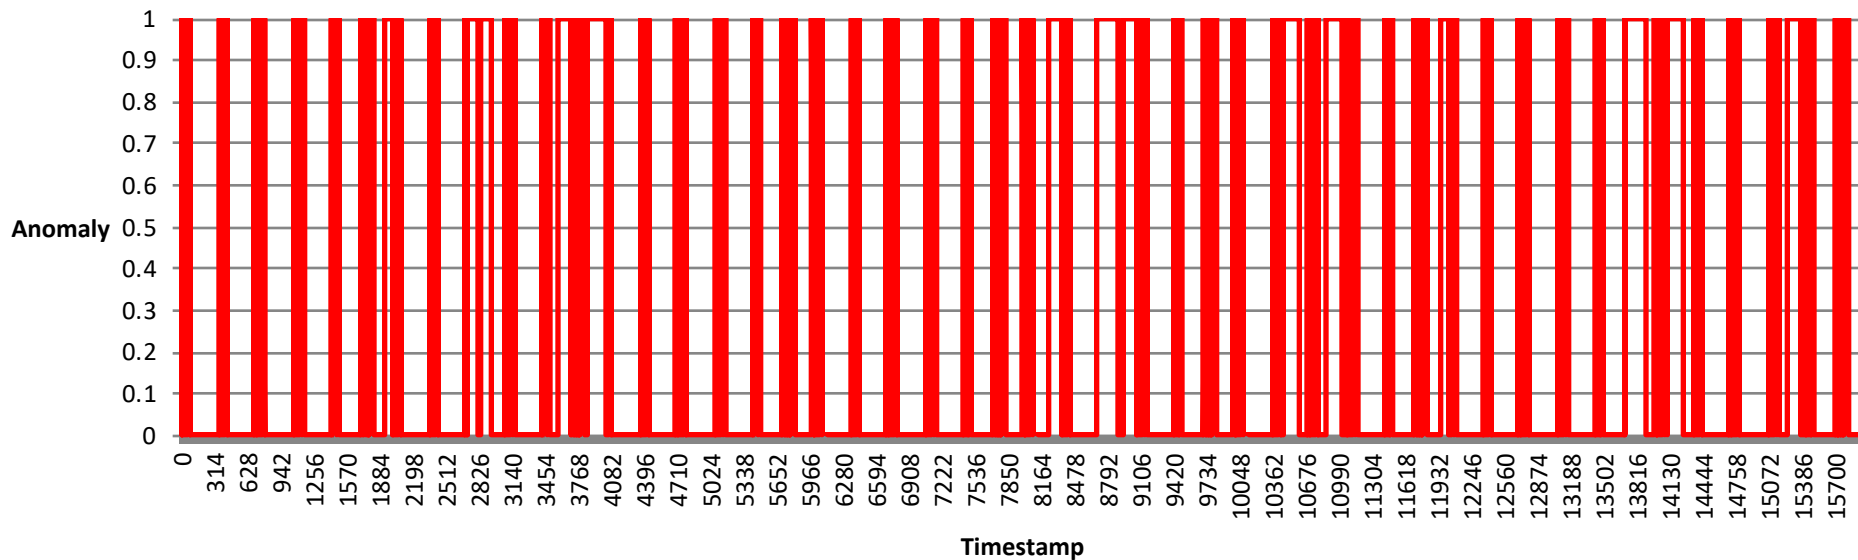

Real Anomaly Ranges



Predicted Anomaly Ranges

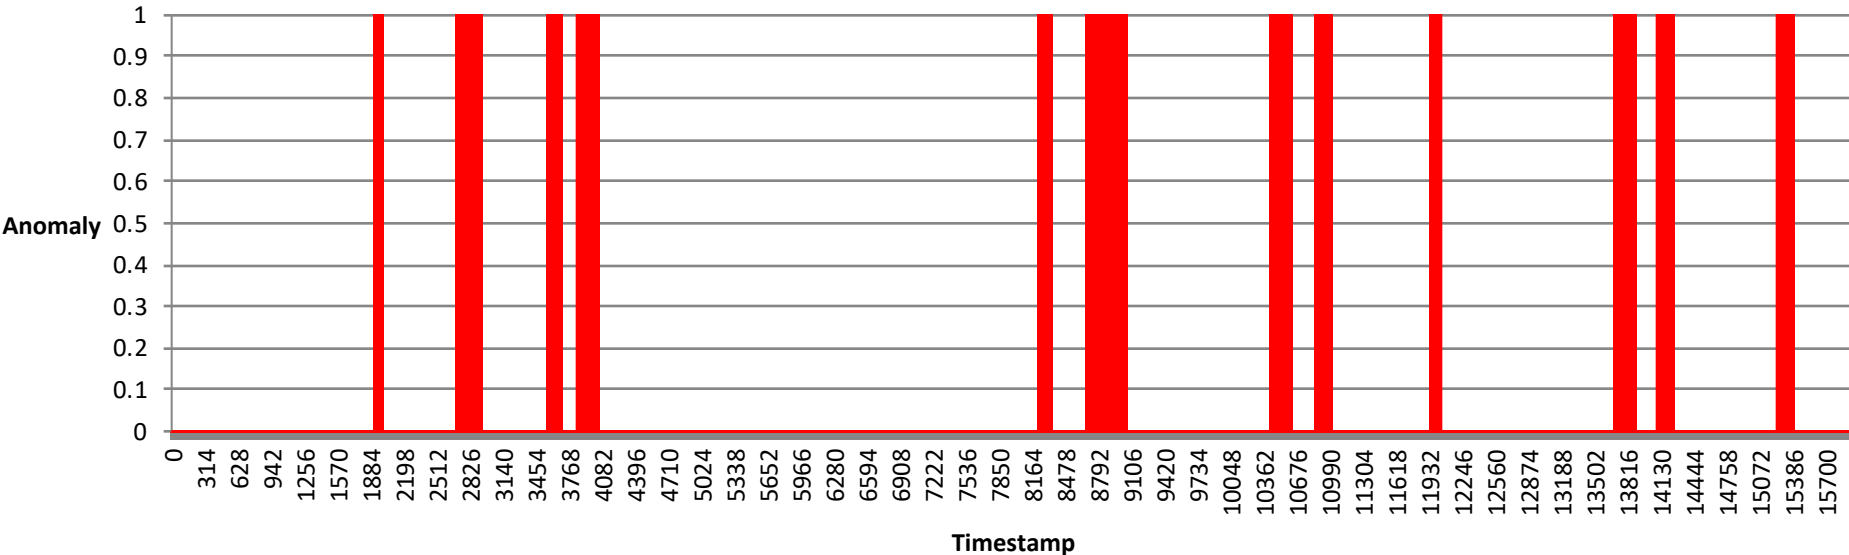



# NYC-Taxi, LSTM-AD

Real Anomaly Ranges

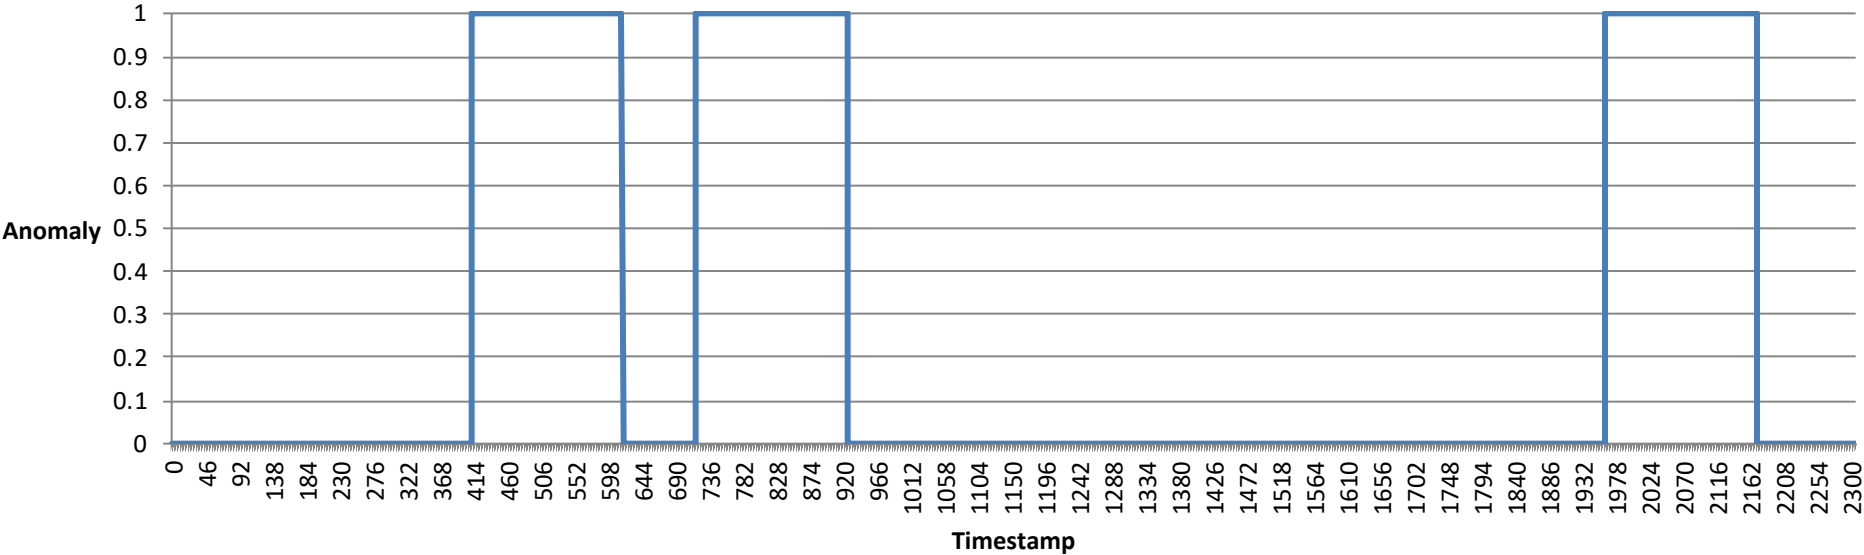

Predicted Anomaly Ranges

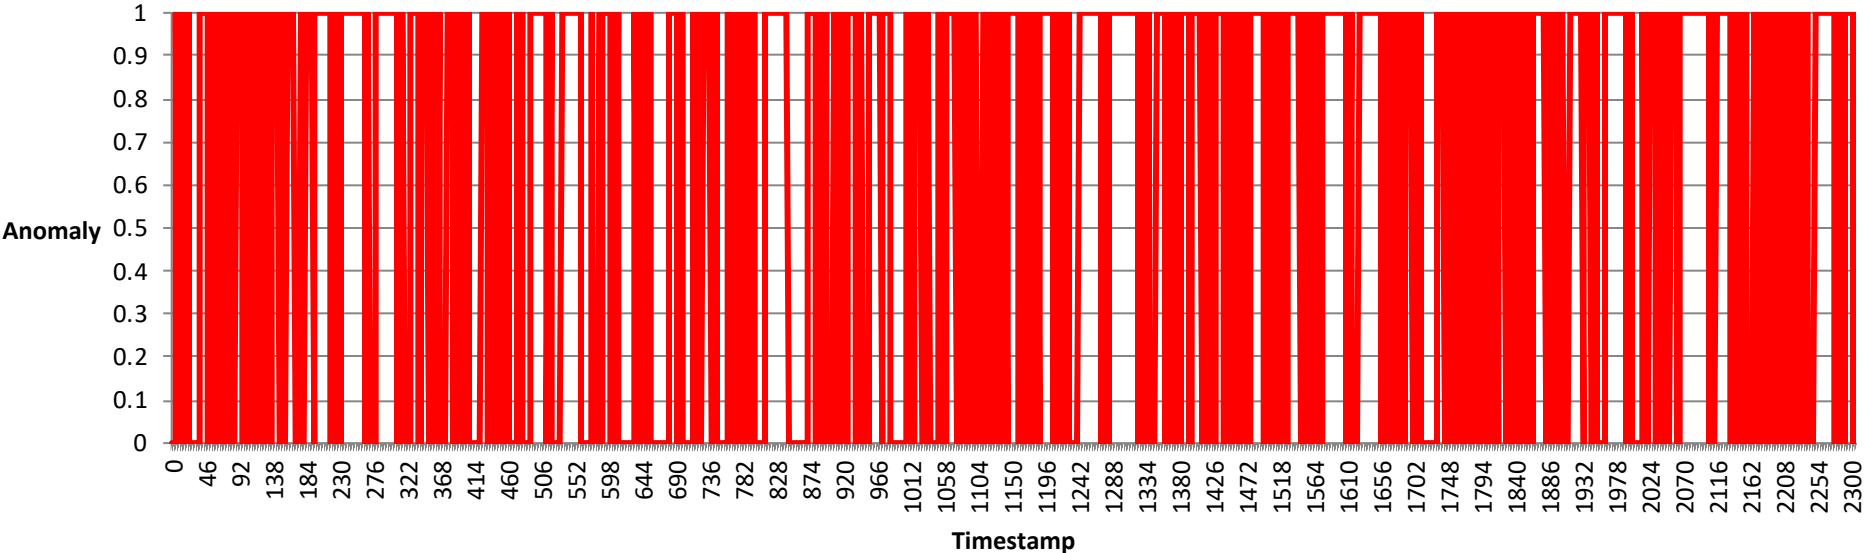

# NYC-Taxi, Greenhouse

Real Anomaly Ranges



Predicted Anomaly Ranges

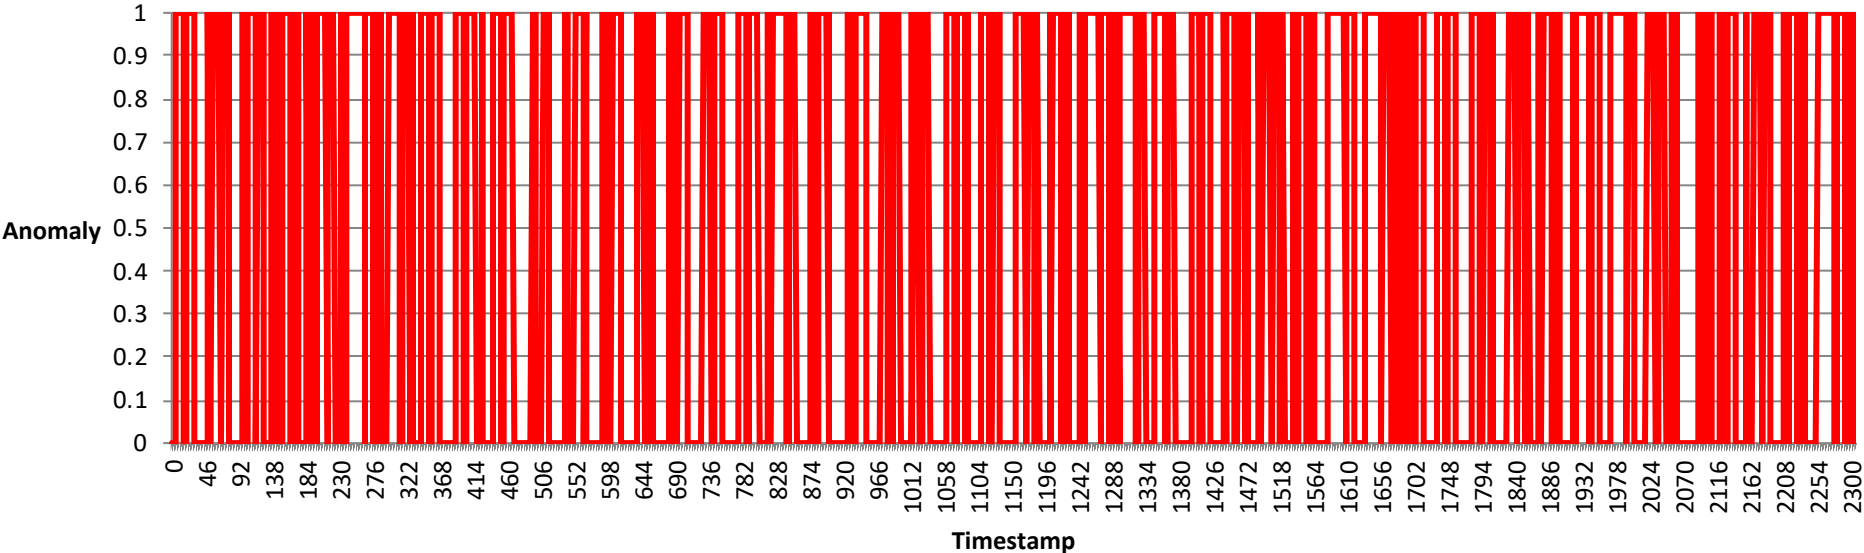

Real Anomaly Ranges

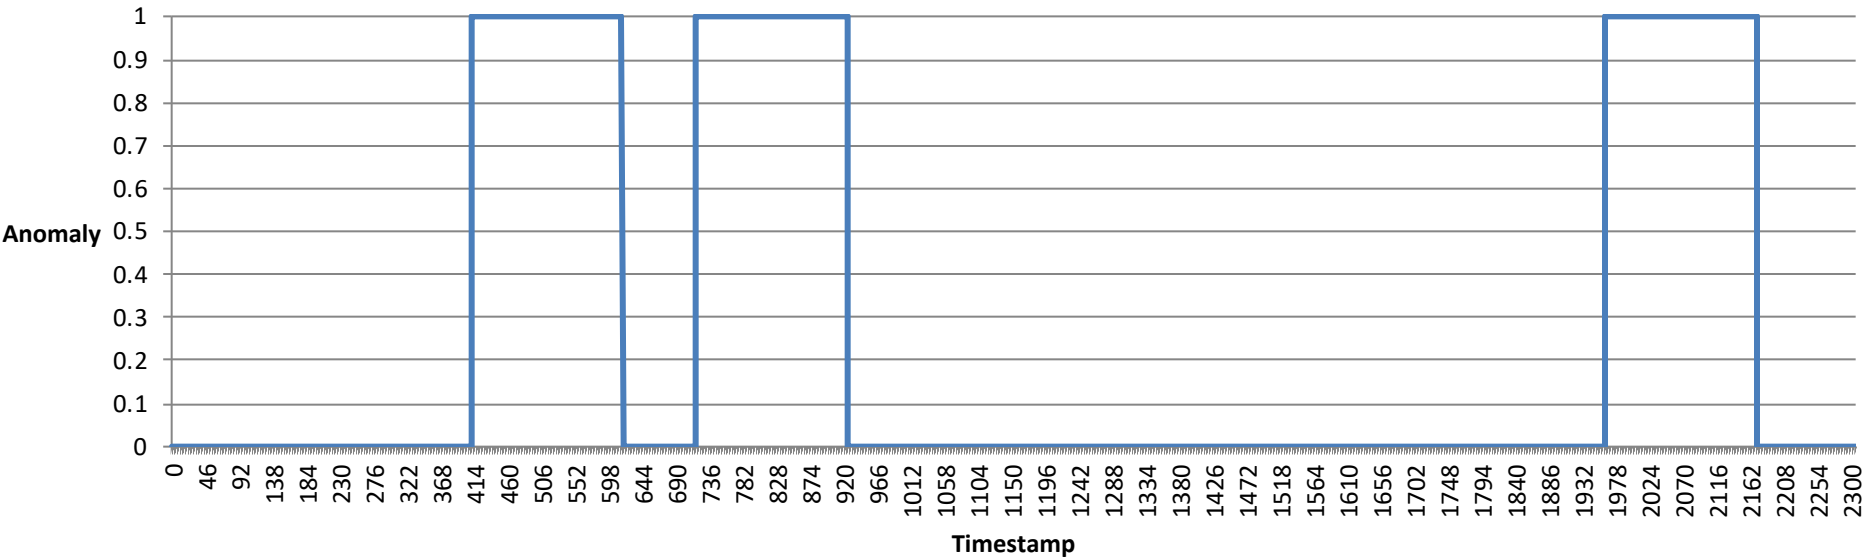

Predicted Anomaly Ranges

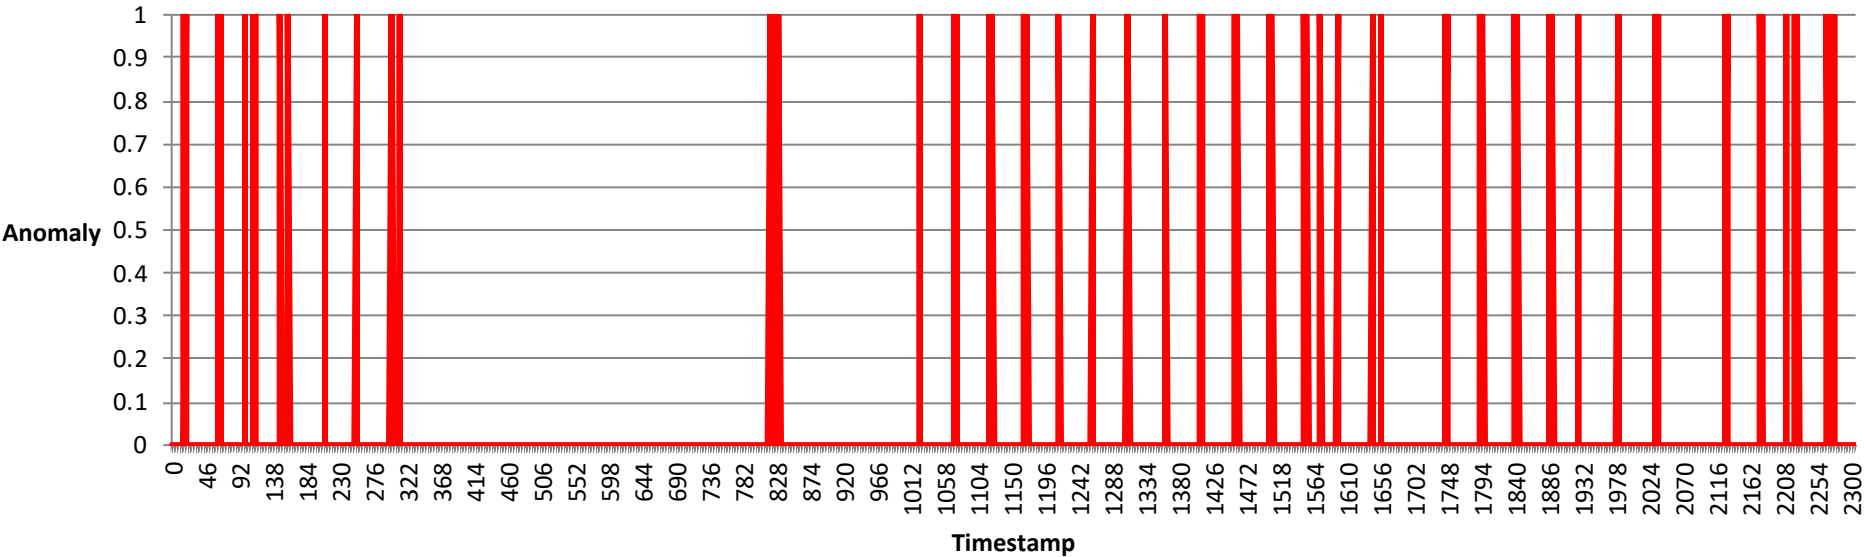

Supplement: Supplementary file [file 8f468c873a32bb0619eaeb2050ba45d1-Supplemental.zip]
